# Supplementary material for: A modified BPaL regimen for tuberculosis treatment replaces linezolid with inhaled spectinamides
Source: eLife. 2024 Oct 8;13:RP96190. doi: 10.7554/eLife.96190 (PMC11460978; doi:10.7554/eLife.96190)
Supplement: Figure 1—figure supplement 1—source data 1. [file elife-96190-fig1-figsupp1-data1.xlsx]

## Sheet: lg
UnRx							BPaL							BPaS
6.81845	7.21307	7.32092	6.12899	7.89279	7.82221	6.72016	3.82391	2.69897	1.30103	5.50769	5.82661	2.30103	4.37621	5.46146	2	2.68723	5.34895	5.40226	2.53991	5.30642

## Sheet: sp
UnRx							BPaL							BPaS
5.6784	6.26423	5.96907	5.71349	5.71181	5.11672	5.30463	1.30103	1.30103	1.30103	1.30103	1.30103	1.30103	1.30103	1.30103	1.30103	1.30103	1.30103	1.90309	1.30103	1.8451
