# Supplementary material for: A modified BPaL regimen for tuberculosis treatment replaces linezolid with inhaled spectinamides
Source: eLife. 2024 Oct 8;13:RP96190. doi: 10.7554/eLife.96190 (PMC11460978; doi:10.7554/eLife.96190)
Supplement: Figure 1—figure supplement 2—source data 1. [file elife-96190-fig1-figsupp2-data1.xlsx]

## Sheet: lg
UnRx									BPa									BPaL									BPaS
7.60879	7.82729	7.38415	7.92922	7.22523	7.64098	7.31604	7.3888	7.80306	6.48117	6.91425		6.72525	6.74851					6.15254	6.08614	6.96023	6.46844						6.19498	6.3974	5.78622

## Sheet: sp
UnRx									BPa									BPaL									BPaS
7.03892	5.21085	5.61979	5.55931	5.64917	5.43735	6.81707	5.64098	5.73706	3.08398	2	1.3	1.3	1.3					1.3	1.3	1.3	1.3						1.3	1.3	1.3
