# Supplementary material for: A modified BPaL regimen for tuberculosis treatment replaces linezolid with inhaled spectinamides
Source: eLife. 2024 Oct 8;13:RP96190. doi: 10.7554/eLife.96190 (PMC11460978; doi:10.7554/eLife.96190)
Supplement: Figure 1—figure supplement 3—source data 1. [file elife-96190-fig1-figsupp3-data1.xlsx]

## Sheet: lg
UnRx							BPa							BPaL							BPaS
7.59	6.74	7.46	8.6	8.69			3.62	3.54	5.56	5.49	3.17	6.13	6.03	3.92	5.01	5.11	6.17	3	6.18	4.82	5.33	3.87	5.83	5.81	6.25	5.49

## Sheet: sp
UnRx							BPa							BPaL							BPaS
5.04	5.24	5.8	4.78	6.31			1.3	1.3	1.3	1.3	1.3	1.3	1.3	2.69	2	2.3	2.3	2.69	2.69	1.3	1.3	4.09	2.69	1.3	1.3	2
