# Supplementary material for: A modified BPaL regimen for tuberculosis treatment replaces linezolid with inhaled spectinamides
Source: eLife. 2024 Oct 8;13:RP96190. doi: 10.7554/eLife.96190 (PMC11460978; doi:10.7554/eLife.96190)
Supplement: Figure 1—figure supplement 4—source data 1. [file elife-96190-fig1-figsupp4-data1.xlsx]

## Sheet: mono
	UnRx						L						S
Weeks	ms1	ms2	ms3	ms4	ms5	ms6	ms1	ms2	ms3	ms4	ms5	ms6	ms1	ms2	ms3	ms4	ms5	ms6
0	27.1	34	32.9	30.9	35.8	27.5	27.4	34.8	30.3	34.1	32.3	31.3	25.6	33.3	40.1	35.7	33.2	26
1	25.5	34.3	33.5	30.8	36.2	26.4	34.6	27.8	30.1	33.4	31.6	30.4	25.8	33.6	40	34.8	31.4	25.6
2	20.8	35.7	35.7	31.4	38.2	24.3	28.4	34.7	30.5	32.5	31.3	30.8	27.4	32.9	39.7	33.2	32.6	25.3
3	20.8	34.7	37	31.7	38.1	24	31.6	35.3	29.8	33.6	33.6	30.3	29.5	31.4	40.5	33	32.6	24.7
4	20.8	36.7	36.6	29.4	38.6	19.8	31.5	34.2	30.4	33.4	33.5	29.4	29.5	26.6	40.5	33.2	32.6	25.2

## Sheet: combination
	UnRx																					BPa												BPaL
Weeks	ms1	ms2	ms3	ms4	ms5	ms6	ms7	ms8	ms9	ms10	ms11	ms12	ms13	ms14	ms15	ms16	ms17	ms18	ms19	ms20	ms21	ms1	ms2	ms3	ms4	ms5	ms6	ms7	ms8	ms9	ms10	ms11	ms12	ms1	ms2	ms3	ms4	ms5	ms6	ms7	ms8	ms9	ms10	ms11	ms12	ms13	ms14	ms15	ms16
0	32	29.5	29.7	27	31.7	23.8	31.2	26.5	29	33.1	28.3	30.7	30.9	26.3	25.9	27.1	34	32.9	30.9	35.8	27.5						30.1	36.9	33.5	28.4	31.9	32	31.3	35.8	28.6	30.2	37.9	33.8					26	30.6	32.6	21.1	37.3	28.1	32.2
1	29.2	32.7	31.7	27	29.6	28.2	26.1	30.3	33.4	22.7	31.3	31.9	26.2	29.2	28.5	25.5	34.3	33.5	30.8	36.2	26.4	35.2	31.4	24.5	28	30	30.8	37.1	33.4	28.1	32	32.4	31.4	35.2	31.1	29.8	36.5	28.5	27.2	30.1	32.2	24.1	29.4	25.7	31.9	21.4	36.7	28.5	30.8
2	24.8	32.4	31.1	29.4	28.9	36.6	35.1	28.9	28.9	25		29.3	31.3	33.7		20.8	35.7	35.7	31.4	38.2	24.3	31.3	23.8	29.9	26.3	33.5	30.1	35.5	32	27.2	31	30.1	29.2	26.1	27.1	32	29.7	31.6	29.1	26.8	28.8	23.7	27.7	25.1	29.1	21.8	35	28.1	29.3
3	31.2	33.2	27.5	26.7	27.2	35.3	29.3	32	30.9	30.8	30.4	29.4	31.2	33.5	35.9		34.7	37	31.7	38.1	24	30.6	31.2	33.7	24.6	26.6	27.9	34.5	32.5	25.8	29.8	31.1	29.6	28.1	27.8	30	28.4	30.4	24.8	28.8	25.9	28.4	26.8	25.8	28.6	23.4	33.7	28.6	27.8
4	34.5	25.6	32.8	29.4	22.5												36.7	36.6	29.4	38.6	19.8	26.1	31.1	30.7	34	24.5	28.5	33.1	31.6	24.1	30.9	32	30.9	27.2	29.2	28.5	30.4	32.5	24.4	28.7	29.5	26.2	26.8	25.8	27.3	23.8	35.8	29.4	29.1
[truncated: 15 more columns]
