# Supplementary material for: A modified BPaL regimen for tuberculosis treatment replaces linezolid with inhaled spectinamides
Source: eLife. 2024 Oct 8;13:RP96190. doi: 10.7554/eLife.96190 (PMC11460978; doi:10.7554/eLife.96190)
Supplement: Figure 1—figure supplement 5—source data 1. [file elife-96190-fig1-figsupp5-data1.xlsx]

## Sheet: Sheet1
Weeks		UnRx	BPaL	BPaS
0		100	100	100
1		100.3	96.87	97.36
2		98.2	89.06	94.46
3		97.16	87.62	95.69
4		97.48	89.15	95.92
