# Supplementary material for: A modified BPaL regimen for tuberculosis treatment replaces linezolid with inhaled spectinamides
Source: eLife. 2024 Oct 8;13:RP96190. doi: 10.7554/eLife.96190 (PMC11460978; doi:10.7554/eLife.96190)
Supplement: Figure 1—figure supplement 6—source data 1. [file elife-96190-fig1-figsupp6-data1.xlsx]

## Sheet: Sheet1
Weeks		UnRx	BPaL	BPaS	BPa
0		100	100	100	100
1		100.74	97.93	98.4	99.4
2		108.86	93.45	96.91	96.53
3		111.55	93.02	97.53	97.8
4		113	93.79	95.31	97.6
