# Supplementary material for: A modified BPaL regimen for tuberculosis treatment replaces linezolid with inhaled spectinamides
Source: eLife. 2024 Oct 8;13:RP96190. doi: 10.7554/eLife.96190 (PMC11460978; doi:10.7554/eLife.96190)
Supplement: Figure 1—figure supplement 7—source data 1. [file elife-96190-fig1-figsupp7-data1.xlsx]

## Sheet: Sheet1
Weeks		UnRx	BPa	BPaL	BPaS
0		100	100	100	100
1		99.2	100.49	97.79	98.32
2		98.88	95.98	93.81	94.32
3		105.53	94.24	91.34	94.32
4		102.72	94.2	90.38	95.24
