# Supplementary material for: A modified BPaL regimen for tuberculosis treatment replaces linezolid with inhaled spectinamides
Source: eLife. 2024 Oct 8;13:RP96190. doi: 10.7554/eLife.96190 (PMC11460978; doi:10.7554/eLife.96190)
Supplement: Figure 1—figure supplement 8—source data 1. [file elife-96190-fig1-figsupp8-data1.xlsx]

## Sheet: lg
UnRx					BpaL					BPaS
4.27955	6.48058	4.50853	4.49831	5.39094	1.1	1.1	1.1	1.1	1.1	1.1	1.1	1.1	1.1	1.1

## Sheet: sp
UnRx					BPaL					BPaS
4.64296	6.11499	5.01494	5.51999	5.22044	1.1	1.1	1.1	1.1	1.1	1.1	1.1	1.1	1.1	1.1
