# Supplementary material for: A modified BPaL regimen for tuberculosis treatment replaces linezolid with inhaled spectinamides
Source: eLife. 2024 Oct 8;13:RP96190. doi: 10.7554/eLife.96190 (PMC11460978; doi:10.7554/eLife.96190)
Supplement: Figure 1—figure supplement 9—source data 1. [file elife-96190-fig1-figsupp9-data1.xlsx]

## Sheet: lg
UnRx							BPaL					BPaS
5.31702	5.32222	5.31963	5.63347	5.74364	5.27684	5.19957	1.1	1.1	1.1	1.1	1.1	1.1	1.1	1.30103	1.30103	1.1

## Sheet: sp
UnRx							BPaL					BPaS
5.83463	5.26324	5.03476	5.28302	5.73038	5.08219	4.74722	1.1	1.1	1.1	1.1	1.1	1.1	1.1	1.1	1.1	1.1
