# Supplementary material for: A modified BPaL regimen for tuberculosis treatment replaces linezolid with inhaled spectinamides
Source: eLife. 2024 Oct 8;13:RP96190. doi: 10.7554/eLife.96190 (PMC11460978; doi:10.7554/eLife.96190)
Supplement: Figure 1—figure supplement 10—source data 1. [file elife-96190-fig1-figsupp10-data1.xlsx]

## Sheet: monotherapy
	UnRx					Vehicle				LZD				1599
Weeks	ms1	ms2	ms3	ms4	ms5	ms1	ms2	ms3	ms4	ms1	ms2	ms3	ms4	ms1	ms2	ms3	ms4
0	22.5	21.3	25.7	25.2	24.6	21.9	23.5	24.8	19.4	21.9	24.8	25.7	25.4	22	22.1	22.6	22.8
1	24.5	23.6	21.1	21.9	25.4	21.3	24.8	23	18.8	22.5	24.5	25.2	25	20.6	21.5	20.6	21.9
2	25.7	25.3	25.3	22	22.1	21.1	19.7	24.8	23.3	21.7	24.2	25.3	24.4	21.7	22.3	22	21
3	21.4	22.8	23.7	25.4	25.4	19.4	21.2	24	23.6	21.8	25.5	24.2	25.4	21.2	21.4	22.8	21.7
4	25.9	24.2	23	22.1	25.6	25.2	19.9	21.6	23.1	26.3	25.8	25	22.7	21.7	22.1	22.4	21.8

## Sheet: combination
	UnRx										BPaL										BPaS
Weeks	ms1	ms2	ms3	ms4	ms5	ms6	ms7	ms8	ms9	ms10	ms1	ms2	ms3	ms4	ms5	ms6	ms7	ms8	ms9	ms10	ms1	ms2	ms3	ms4	ms5	ms6	ms7	ms8	ms9	ms10
0	21.8	24.1	23.7	22.6	22.6	22.5	21.3	25.7	25.2	24.6	24.8	27.1	23	23.4	24	26.2	23.4	24	24.8	22.4	25.3	24.1	23	23.4	24	25.4	23.4	22.4	23.6	23.1
1	23.9	22.5	22.6	23.5	24	24.5	23.6	21.1	21.9	25.4	26.1	23.4	25.6	23.4	25.4	22.4	23.3	24.8	24.2	22.3	22.2	25.4	21.2	23.2	23.4	23.7	22.2	22.2	23	22.8
2	22.4	23.4	24.2	23.2	23.3	25.7	25.3	25.3	22	22.1	24.9	23.3	23.6	23.9	22.8	22.8	24.3	21.1	21.2	21.2	24.1	23.5	24	24.8	23.4	21.3	21.9	21.8	22.6	23.4
3	23.4	24.8	23.1	25	24.8	21.4	22.8	23.7	25.4	25.4	23	23.4	23.6	24.1	23.4	20.9	21.1	21.5	22.6	23.9	25.2	24.2	23.6	24.8	23.8	21.3	21.8	21.9	22.9	22.9
4	24.3	23.8	23	25.2	23.1	25.9	24.2	23	22.1	25.6	23.7	23.5	23.3	22.9	22.8	21.7	23.4	22.5	22.9	22.1	24.2	24.2	24.7	24.3	23.9	22	22.2	23.4	23.4	22.4
