# Supplementary material for: A modified BPaL regimen for tuberculosis treatment replaces linezolid with inhaled spectinamides
Source: eLife. 2024 Oct 8;13:RP96190. doi: 10.7554/eLife.96190 (PMC11460978; doi:10.7554/eLife.96190)
Supplement: Figure 1—figure supplement 11—source data 1. [file elife-96190-fig1-figsupp11-data1.xlsx]

## Sheet: Sheet1
Weeks		UnRx	BPaL	BPaS
0		100	100	100
1		101.35	101.19	96.16
2		101.44	96.81	100
3		105.4	96.03	101.38
4		103.92	94.97	101.13
