# Supplementary material for: A modified BPaL regimen for tuberculosis treatment replaces linezolid with inhaled spectinamides
Source: eLife. 2024 Oct 8;13:RP96190. doi: 10.7554/eLife.96190 (PMC11460978; doi:10.7554/eLife.96190)
Supplement: Figure 1—figure supplement 12—source data 1. [file elife-96190-fig1-figsupp12-data1.xlsx]

## Sheet: Sheet1
Weeks		UnRx	BPaL	BPaS
0		100	100	100
1		97.69	96.85	94.14
2		100.97	91.47	94.14
3		99.62	91.05	94.05
4		101.43	93.16	96.22
