# Supplementary material for: A modified BPaL regimen for tuberculosis treatment replaces linezolid with inhaled spectinamides
Source: eLife. 2024 Oct 8;13:RP96190. doi: 10.7554/eLife.96190 (PMC11460978; doi:10.7554/eLife.96190)
Supplement: Figure 1—source data 1. [file elife-96190-fig1-data1.xlsx]

## Sheet: cfu lg
Lung cfu of monotherapy in C3HeB/FeJ mice
UnRx						L						S
ms1	ms2	ms3	ms4	ms5	ms6	ms1	ms2	ms3	ms4	ms5	ms6	ms1	ms2	ms3	ms4	ms5	ms6
7.59	6.74	7.46	8.6	8.69		7.79	7.48	5.09	7.55	8	7.93	5.24	8.09	6	6.83	8.38	6.9

## Sheet: cfu sp
Spleen cfu of monotherapy in C3HeB/FeJ mice
UnRx						L						S
ms1	ms2	ms3	ms4	ms5	ms6	ms1	ms2	ms3	ms4	ms5	ms6	ms1	ms2	ms3	ms4	ms5	ms6
5.04	5.24	5.8	4.78	6.31		4.72	4.49	4.73	4.43	4.55	4.04	4.83	5.27	4.97	5.05	5.05	4.47
