# Supplementary material for: A modified BPaL regimen for tuberculosis treatment replaces linezolid with inhaled spectinamides
Source: eLife. 2024 Oct 8;13:RP96190. doi: 10.7554/eLife.96190 (PMC11460978; doi:10.7554/eLife.96190)
Supplement: Figure 1—source data 2. [file elife-96190-fig1-data2.xlsx]

## Sheet: cfu lg
Lung cfu of monotherapy in BALB/c mice
UnRx							Vehicle							LZD							1599
ms1	ms2	ms3	ms4	ms5	ms6	ms7	ms1	ms2	ms3	ms4				ms1	ms2	ms3	ms4				ms1	ms2	ms3	ms4
5.31702	5.32222	5.31963	5.63347	5.74364	5.27684	5.19957	4.87986	5.76938	5.58358	5.7506				4.63094	4.14457	4.95328	4.57403				4.82119	4.542	4.58358	4.58358

## Sheet: cfu sp
Spleen cfu of monotherapy in BALB/c mice
UnRx							Vehicle							LZD							1599
ms1	ms2	ms3	ms4	ms5	ms6	ms7	ms1	ms2	ms3	ms4				ms1	ms2	ms3	ms4				ms1	ms2	ms3	ms4
5.83463	5.26324	5.03476	5.28302	5.73038	5.08219	4.74722	4.87434	5.52179	5.77924	5.39211				4.99123	4.51851	5.56407	4.57403				4.40739	5.32858	5.10551	4.82064
