# Supplementary material for: A modified BPaL regimen for tuberculosis treatment replaces linezolid with inhaled spectinamides
Source: eLife. 2024 Oct 8;13:RP96190. doi: 10.7554/eLife.96190 (PMC11460978; doi:10.7554/eLife.96190)
Supplement: Figure 1—source data 3. [file elife-96190-fig1-data3.xlsx]

## Sheet: cfu lg
Lung cfu of combination therapy in C3HeB/FeJ mice (combined data)
UnRx																					BPa											BPaL
ms1	ms2	ms3	ms4	ms5	ms6	ms7	ms8	ms9	ms10	ms11	ms12	ms13	ms14	ms15	ms16	ms17	ms18	ms19	ms20	ms21	ms1	ms2	ms3	ms4	ms5	ms6	ms7	ms8	ms9	ms10	ms11	ms1	ms2	ms3	ms4	ms5	ms6	ms7	ms8	ms9	ms10	ms11	ms12	ms13	ms14	ms15	ms16	ms17	ms18
6.81845	7.21307	7.32092	6.12899	7.89279	7.82221	6.72016	7.60879	7.82729	7.38415	7.92922	7.22523	7.64098	7.31604	7.3888	7.80306	7.59	6.74	7.46	8.6	8.69	6.48117	6.91425	6.72525	6.74851	3.62	3.54	5.56	5.49	3.17	6.13	6.03	3.82391	2.69897	1.30103	5.50769	5.82661	2.30103	4.37621	6.15254	6.08614	6.96023	6.46844	3.92	5.01	5.11	6.17	3	6.18	4.82
[truncated: 16 more columns]

## Sheet: cfu sp
Spleen cfu of combination therapy in C3HeB/FeJ mice (combined data)
UnRx																					BPa											BPaL
ms1	ms2	ms3	ms4	ms5	ms6	ms7	ms8	ms9	ms10	ms11	ms12	ms13	ms14	ms15	ms16	ms17	ms18	ms19	ms20	ms21	ms1	ms2	ms3	ms4	ms5	ms6	ms7	ms8	ms9	ms10	ms11	ms1	ms2	ms3	ms4	ms5	ms6	ms7	ms8	ms9	ms10	ms11	ms12	ms13	ms14	ms15	ms16	ms17	ms18
5.6784	6.26423	5.96907	5.71349	5.71181	5.11672	5.30463	7.03892	5.21085	5.61979	5.55931	5.64917	5.43735	6.81707	5.64098	5.73706	5.04	5.24	5.8	4.78	6.31	3.08398	2	1.30103	1.30103	1.30103	1.30103	1.30103	1.30103	1.30103	1.30103	1.30103	1.30103	1.30103	1.30103	1.30103	1.30103	1.30103	1.30103	1.30103	1.30103	1.30103	1.30103	1.30103	2.69	2	2.3	2.3	2.69	2.69
[truncated: 16 more columns]
