# Supplementary material for: A modified BPaL regimen for tuberculosis treatment replaces linezolid with inhaled spectinamides
Source: eLife. 2024 Oct 8;13:RP96190. doi: 10.7554/eLife.96190 (PMC11460978; doi:10.7554/eLife.96190)
Supplement: Figure 1—source data 4. [file elife-96190-fig1-data4.xlsx]

## Sheet: cfu lg
Lung cfu of combination therapy in BALB/c mice (combined data)
UnRx												BPaL												BPaS
ms1	ms2	ms3	ms4	ms5	ms6	ms7	ms8	ms9	ms10	ms11	ms12	ms1	ms2	ms3	ms4	ms5	ms6	ms7	ms8	ms9	ms10	ms11	ms12	ms1	ms2	ms3	ms4	ms5	ms6	ms7	ms8	ms9	ms10	ms11	ms12
5.31702	5.32222	5.31963	5.63347	5.74364	5.27684	5.19957	4.27955	6.48058	4.50853	4.49831	5.39094	2.47712	1.1	2	1.1	1.1	1.1	1.1	1.1	1.1	1.1	1.1	1.1	2.11394	1.1	2.95745	1.1	1.1	1.90309	1.1	1.1	1.1	1.30103	1.30103	1.1

## Sheet: cfu sp
Spleen cfu of combination therapy in BALB/c mice (combined data)
UnRx												BPaL												BPaS
ms1	ms2	ms3	ms4	ms5	ms6	ms7	ms8	ms9	ms10	ms11	ms12	ms1	ms2	ms3	ms4	ms5	ms6	ms7	ms8	ms9	ms10	ms11	ms12	ms1	ms2	ms3	ms4	ms5	ms6	ms7	ms8	ms9	ms10	ms11	ms12
5.83463	5.26324	5.03476	5.28302	5.73038	5.08219	4.74722	4.64296	6.11499	5.01494	5.51999	5.22044	1.3	1.3	1.3	1.3	1.3	1.3	1.3	1.3	1.3	1.3	1.3	1.3	1.3	1.3	1.3	1.3	1.3	1.3	1.3	1.3	1.3	1.3	1.3	1.3
