# Supplementary material for: A modified BPaL regimen for tuberculosis treatment replaces linezolid with inhaled spectinamides
Source: eLife. 2024 Oct 8;13:RP96190. doi: 10.7554/eLife.96190 (PMC11460978; doi:10.7554/eLife.96190)
Supplement: Figure 2—source data 1. [file elife-96190-fig2-data1.xlsx]

## Sheet: Lesion score
Lesion score for C3HeB/FeJ mice
Slide	Image	Name	Class	Parent	ROI	Centroid X Âµm	Centroid Y Âµm	Area Âµm^2	Perimeter Âµm	Lymphatic Region Deduction	Lesion Percentage
BPaS_1	1_Scan1.qptiff - resolution #1	Stroma	Stroma	PathAnnotationObject	Geometry	7356.4	8173	5.70013e+07	1.36636e+06		15.9769
	1_Scan1.qptiff - resolution #1	Necrosis	Necrosis	PathAnnotationObject	Geometry	7334.4	8774.1	1.08387e+07	603222
	1_Scan1.qptiff - resolution #1	PathAnnotationObject		Image	Polygon	7227.3	7940.7	1.5941e+08	48835.9
	1_Scan1.qptiff - resolution #1	Background	Background	PathAnnotationObject	Geometry	7162.2	7674.3	8.61034e+07	390178
BPaS_2	2_Scan1.qptiff - resolution #1	PathAnnotationObject		Image	Polygon	13070.3	28869.5	1.01526e+08	42546.2		33.1676
	2_Scan1.qptiff - resolution #1	Stroma	Stroma	PathAnnotationObject	Geometry	12794.6	28652.2	40092325	1.07302e+06
	2_Scan1.qptiff - resolution #1	Background	Background	PathAnnotationObject	Geometry	13042.8	29127.4	3.80752e+07	188492
	2_Scan1.qptiff - resolution #1	Necrosis	Necrosis	PathAnnotationObject	Geometry	13679.6	28804.9	19897005	606737
BPaL_1	4_Scan1.qptiff - resolution #1	PathAnnotationObject		Image	Polygon	5584.8	14592.5	103825376	48809		23.3663
	4_Scan1.qptiff - resolution #1	Stroma	Stroma	PathAnnotationObject	Geometry	5641.8	15070.9	4.84195e+07	1.30002e+06
	4_Scan1.qptiff - resolution #1	Necrosis	Necrosis	PathAnnotationObject	Geometry	5357.6	13052.8	1.47635e+07	546184
	4_Scan1.qptiff - resolution #1	Background	Background	PathAnnotationObject	Geometry	5587.9	14581.7	3.67985e+07	230468
BPaL_2	5_Scan1.qptiff - resolution #1	Background	Background	PathAnnotationObject	Geometry	7553.9	12420.9	2.29634e+07	162186		20.5918
	5_Scan1.qptiff - resolution #1	PathAnnotationObject		Image	Polygon	7519.1	12116.6	8.85221e+07	46046.9
	5_Scan1.qptiff - resolution #1	Necrosis	Necrosis	PathAnnotationObject	Geometry	7840.2	11821.6	1.29265e+07	559290
	5_Scan1.qptiff - resolution #1	Stroma	Stroma	PathAnnotationObject	Geometry	7400.5	12044.5	4.98484e+07	1.16908e+06
BPaL_3	3_Scan1.qptiff - resolution #1	Stroma	Stroma	PathAnnotationObject	Geometry	8709.5	12956.8	5.59352e+07	1.42371e+06	5.58541e+07	32.6635
	3_Scan1.qptiff - resolution #1	Background	Background	Ignore*	Polygon	8234.2	11882.7	61836.5	3633.5
	3_Scan1.qptiff - resolution #1	PathAnnotationObject		Image	Polygon	7544	12648.9	1.13809e+08	47196.5
	3_Scan1.qptiff - resolution #1	Background	Background	PathAnnotationObject	Geometry	7177.4	12291.5	2.62216e+07	226320
	3_Scan1.qptiff - resolution #1	Necrosis	Necrosis	PathAnnotationObject	Geometry	5566	12399	2.78511e+07	863110	2.70936e+07
	3_Scan1.qptiff - resolution #1	Ignore*	Ignore*	Image	Polygon	8540.2	11998.6	925549	3695.2
	3_Scan1.qptiff - resolution #1	Stroma	Stroma	Ignore*	Geometry	8586.3	11997.1	81085.5	8653.5
	3_Scan1.qptiff - resolution #1	Necrosis	Necrosis	Ignore*	Geometry	8553.5	12017.9	757447	6878
UnRx_1	20-24_g2_m8.qptiff - resolution #1	Stroma	Stroma	PathAnnotationObject	Geometry	6532.1	16856.9	3.49139e+07	2.33569e+06		65.4235
	20-24_g2_m8.qptiff - resolution #1	Necrosis	Necrosis	PathAnnotationObject	Geometry	7317.5	14715.4	6.6062e+07	1.77584e+06
	20-24_g2_m8.qptiff - resolution #1	Background	Background	PathAnnotationObject	Geometry	7407.6	15163.2	4.00984e+07	284222
	20-24_g2_m8.qptiff - resolution #1	PathAnnotationObject		Image	Polygon	7145.9	15415.3	1.48106e+08	49376.6
UnRx_2	20-24_g2_m9.qptiff - resolution #1	Stroma	Stroma	PathAnnotationObject	Geometry	9156.8	19680	1.57511e+07	902418		89.1375
	20-24_g2_m9.qptiff - resolution #1	PathAnnotationObject		Image	Polygon	8806.2	23470.6	2.14716e+08	68861.8
	20-24_g2_m9.qptiff - resolution #1	Background	Background	PathAnnotationObject	Geometry	8299.9	23053.4	6.55682e+07	260166
	20-24_g2_m9.qptiff - resolution #1	Necrosis	Necrosis	PathAnnotationObject	Geometry	9018.2	24200.2	1.29254e+08	1.07761e+06
UnRx_3	20-24_g2_m10.qptiff - resolution #1	Necrosis	Necrosis	PathAnnotationObject	Geometry	8753.2	19470	1.67621e+08	1387646		92.9938
	20-24_g2_m10.qptiff - resolution #1	Stroma	Stroma	PathAnnotationObject	Geometry	8882.7	22964	1.26287e+07	923697
	20-24_g2_m10.qptiff - resolution #1	PathAnnotationObject		Image	Polygon	9575.8	19044.9	2.7272e+08	84543.4
	20-24_g2_m10.qptiff - resolution #1	Background	Background	PathAnnotationObject	Geometry	11289.9	17567.9	8.71315e+07	329722
UnRx_4	20-24_g2_m11.qptiff - resolution #1	PathAnnotationObject		Image	Polygon	10050.3	16052.4	2.76381e+08	70669.5		87.89
	20-24_g2_m11.qptiff - resolution #1	Background	Background	PathAnnotationObject	Geometry	10369.6	14249.2	6.83913e+07	452743
	20-24_g2_m11.qptiff - resolution #1	Necrosis	Necrosis	Ignore*	Geometry	4299.8	18063.9	9.65365e+06	551178
	20-24_g2_m11.qptiff - resolution #1	Stroma	Stroma	PathAnnotationObject	Geometry	7952.8	16834.9	4.29453e+07	1.87321e+06	2.03923e+07
	20-24_g2_m11.qptiff - resolution #1	Stroma	Stroma	Ignore*	Geometry	4430.3	16929.8	2.2553e+07	763462
	20-24_g2_m11.qptiff - resolution #1	Ignore*	Ignore*	Image	Polygon	4333	17201.2	3.90246e+07	25840.7
	20-24_g2_m11.qptiff - resolution #1	Necrosis	Necrosis	PathAnnotationObject	Geometry	10552.1	16589.9	1.57654e+08	1779464	1.48e+08
	20-24_g2_m11.qptiff - resolution #1	Background	Background	Ignore*	Geometry	3730.2	16608.2	4.36585e+06	68588.9
