# Supplementary material for: A modified BPaL regimen for tuberculosis treatment replaces linezolid with inhaled spectinamides
Source: eLife. 2024 Oct 8;13:RP96190. doi: 10.7554/eLife.96190 (PMC11460978; doi:10.7554/eLife.96190)
Supplement: Figure 2—source data 2. [file elife-96190-fig2-data2.xlsx]

## Sheet: Lesion score
Lesion score for BALB/c mice
Image	Name	Class	Parent	ROI	Centroid X Âµm	Centroid Y Âµm	Area Âµm^2	Perimeter Âµm		Lesion score (%)
BPaL_1	Stroma	Stroma	lung_1	Geometry	11959	5299.8	3.48281e+07	393980		3.47396
BPaL_1	Necrosis	Necrosis	lung_1	Geometry	13738.2	4405.9	1.25346e+06	51810.2
BPaL_1	Background	Background	lung_1	Geometry	11235.7	5133.1	2.83729e+07	180379
BPaL_2	Background	Background	lung_2	Geometry	12815.9	22941.4	1.30371e+07	137007		4.3676
BPaL_2	Necrosis	Necrosis	lung_2	Geometry	11155.8	22258.2	1.53681e+06	76405.6
BPaL_2	Stroma	Stroma	lung_2	Geometry	11568.9	22692.7	33649839	438659
BPaL_3	Necrosis	Necrosis	lung_3	Geometry	5399.2	27865.5	1.58133e+06	94681.3		3.6083
BPaL_3	Background	Background	lung_3	Geometry	6021.7	28008.1	3.1353e+07	181110
BPaL_3	Stroma	Stroma	lung_3	Geometry	6113.4	27923.9	4.22436e+07	736391
BPaS_1	Necrosis	Necrosis	lung_1	Geometry	13037	6169.1	4.67735e+06	256496		5.73039												#DIV/0!
BPaS_1	Background	Background	lung_1	Geometry	11140.1	7498.7	7.67861e+07	378960
BPaS_1	Stroma	Stroma	lung_1	Geometry	11971.7	8131	7.69463e+07	1.29549e+06
BPaS_2	Stroma	Stroma	lung_2	Geometry	6364.9	13434.1	5.76981e+07	1.54596e+06		12.7578												#DIV/0!
BPaS_2	Necrosis	Necrosis	lung_2	Geometry	7871.4	15256.8	8.43747e+06	454496
BPaS_2	Background	Background	lung_2	Geometry	5950.6	13139.7	27592874	242480
BPaS_3	Background	Background	lung_3	Geometry	10381.7	27226.9	8.07072e+07	316672		6.1615												#DIV/0!
BPaS_3	Necrosis	Necrosis	lung_3	Geometry	8621.2	25924.7	4.84086e+06	255785
BPaS_3	Stroma	Stroma	lung_3	Geometry	9564.8	25711.4	7.37254e+07	1.1638e+06
UnRx_1	Stroma	Stroma	lung_1	Geometry	9171.1	7061.2	5.12619e+07	1.19953e+06		14.9799
UnRx_1	Background	Background	lung_1	Geometry	9404.4	7443	8.04891e+07	227979
UnRx_1	Necrosis	Necrosis	lung_1	Geometry	9203.4	7600.9	9.03196e+06	457228
UnRx_2	Necrosis	Necrosis	lung_2	Geometry	4730.6	22985.5	1.35694e+07	690980		26.3919
UnRx_2	Stroma	Stroma	lung_2	Geometry	4774.9	23046	3.78455e+07	1.40678e+06
UnRx_2	Background	Background	lung_2	Geometry	3959.7	22047	3.87075e+07	226440
UnRx_3	Background	Background	lung_3	Geometry	11539.1	20125	4.05752e+07	247221		14.4125
UnRx_3	Stroma	Stroma	lung_3	Geometry	11412.4	21297.3	5.66912e+07	1.03916e+06
UnRx_3	Necrosis	Necrosis	lung_3	Geometry	11646.2	20743.2	9.54653e+06	389090
