# Supplementary material for: A modified BPaL regimen for tuberculosis treatment replaces linezolid with inhaled spectinamides
Source: eLife. 2024 Oct 8;13:RP96190. doi: 10.7554/eLife.96190 (PMC11460978; doi:10.7554/eLife.96190)
Supplement: Figure 3—source data 1. [file elife-96190-fig3-data1.xlsx]

## Sheet: WK-1
C3HeB/FeJ data
CBC	UnRx								BPa							BPaL							BPaS
Parameters		M1	M2	M3	M4	M5	M6		M1	M2	M3	M4	M5	M6		M1	M2	M3	M4	M5	M6	M7	M1	M2	M3	M4	M5	M6
WBC (10ˆ9/L)		6.79	5.79	4.48	5.66	4.66	5.61		4.13	2.61	7.79	4.06	6.24	6.71		4.82	3.25	2.31	6.19	5.57	4.44	4.83	4.56	4.08	4.57	5.46	5.19	7.11
Lymphocyte (10ˆ9/L)		2.57	3.68	3.07	3.15	2.89	2.09		2.29	1.78	3.79	2.43	3.13	3.62		3.25	1.78	1.2	3.08	4.03	2.54	3.07	3.14	2.53	2.58	3.24	2.56	4.98
Monocyte (10ˆ9/L)		0.45	0.17	0.53	0.33	0.1	0.32		0.1	0.13	0.18	0.2	0.17	0.58		0.1	0.04	0.09	0.26	0.21	0.13	0.48	0.19	0.11	0.1	0.12	0.13	0.5
Neutrophil (10ˆ9/L)		3.77	1.95	0.88	2.19	1.67	3.19		1.73	0.7	3.82	1.43	2.94	2.51		1.47	1.43	1.02	2.85	1.32	1.77	1.28	1.23	1.44	1.89	2.1	2.5	1.64
Lymphocyte% auto		37.9	63.5	68.6	55.6	61.9	37.3		55.5	68.3	48.7	59.7	50.2	53.9		67.4	54.8	51.9	49.8	72.4	57.3	63.6	68.9	62	56.5	59.3	49.3	70
Monocyte% auto		6.6	2.9	11.8	5.7	2.2	5.7		2.5	4.9	2.3	4.9	2.7	8.7		2	1.3	3.9	4.2	3.8	2.9	9.9	4.1	2.7	2.2	2.3	2.5	7
Neutrophil% auto		55.5	33.7	19.6	38.7	35.9	57		42	26.8	49	35.3	47.2	37.4		30.6	44	44.2	46	23.8	39.8	26.5	27	35.3	41.3	38.4	48.2	23
RBC (10ˆ12/L)		12.07	8.14	10.86	11.62	11.36	11.48		11.62	6.46	11.33	11.21	11.62	12.7		10.54	12.68	12.45	13.6	11.22	11.83	10.79	11.37	10	13.03	11.79	12.04	11.59
HGB (g/dL)		14.6	11	14.6	15	14.7	12.5		14.8	8.2	14.1	14.7	14.3	15.1		12.7	15.2	14.9	14.1	14.7	12.7	14	14.7	14.9	15.5	15.4	15.1	15.4
HCT (%)		55.16	44.51	57.26	57.99	58.74	47.48		55.67	34.06	55.51	59.42	56.26	60.24		55.15	59.89	56.8	53.47	59.85	48.97	54.73	60.21	53.78	60.09	60.18	59.85	60.8
MCV (fl)		46	55	53	50	52	41		48	53	49	53	48	47		52	47	46	39	53	41	51	53	54	46	51	50	52
MCH (pg)		12.1	13.5	13.4	12.9	12.9	10.8		12.7	12.6	12.5	13.1	12.3	11.9		12	12	11.9	10.3	13.1	10.7	13	12.9	14.9	11.9	13	12.5	13.3
MCHC (g/dL)		26.5	24.6	25.5	25.8	25	26.2		26.5	23.9	25.5	24.8	25.4	25		23	25.3	26.2	26.3	24.6	25.9	25.6	24.5	27.6	25.9	25.6	25.2	25.4
RDWc (%)		27.1	19.3	19.6	21.5	19.7	25.4		20.7	18.8	21	19.9	21.3	24.4		19.6	22.2	21.8	26.4	19.9	25.6	20.8	19.6	19.9	24.8	20.8	21.2	20.2
RDWs (fl)		45.3	39.1	38.3	39.1	37.5	38.3		36.7	36.7	37.5	39.1	37.5	42.2		38.3	39.1	36.7	38.3	39.1	39.1	39.1	38.3	38.3	42.2	39.1	38.3	39.1
Platelets (10ˆ9/L)		308	260	384	139	473	166		398	231	364	423	361	322		328	414	449	203	321	147	215	355	342	510	501	458	264
MPV (fl)		7.2	8.7	8.2	8.4	9	6.6		8	11.5	8.1	8.8	7.4	7		9.4	7.7	7.7	5.7	9	5.8	8.4	9.2	7.9	8	9.6	8.4	8.4
PCT (%)		0.22	0.23	0.31	0.12	0.43	0.11		0.32	0.27	0.29	0.37	0.27	0.22		0.31	0.32	0.34	0.11	0.29	0.08	0.18	0.33	0.27	0.41	0.48	0.38	0.22
PDWc (%)		33.4	39.6	37.2	36.4	36.6	31		37.7	43.5	37.7	39.4	36.9	34.5		41.5	37.7	37.7	26.7	40.7	26.7	38.4	41.5	35.8	37.7	41.5	39.6	39
PDWs (fl)		10.1	16.6	13.5	13.8	12.9	8.4		14	23.9	14	16.3	13.2	10.9		19.6	14	14	6.2	18.2	6.2	14.9	19.6	12.1	14	19.6	16.6	15.7

## Sheet: WK-2
C3HeB/FeJ data
CBC	UnRx							BPa							BPaL							BPaS
Parameters			M1	M2	M3	M4	M5	M1	M2	M3	M4	M5	M6	M7	M1	M2	M3	M4	M5	M6	M7	M1	M2	M3	M4	M5
WBC (10ˆ9/L)			5.15	5.51	4.39	5.77	9.89	1.97	4.06	3.71	8.04	7.42	2.36	6.23	6.63	3.44	5.29	3.09	4.62	4.13	5.93	3.77	4.4	11.69	4.89	4.36
Lymphocyte (10ˆ9/L)			2.18	3.83	1.92	2.48	3.86	1.09	2.38	2.57	2.92	4.54	1.39	2.77	4.87	2.02	2.56	2.09	3.63	2.95	3.75	2.88	2.48	8.98	1.6	2.97
Monocyte (10ˆ9/L)			0.21	0.32	0.3	0.36	0.49	0.14	0.07	0.06	0.6	0.44	0.09	0.1	0.08	0.07	0.5	0.28	0.02	0.19	0.46	0.21	0.3	0.08	0.35	0.16
Neutrophil (10ˆ9/L)			2.76	1.36	2.17	2.93	5.54	0.73	1.61	1.07	4.53	2.43	0.87	3.35	1.68	1.34	2.24	0.72	0.97	0.99	1.71	0.69	1.62	2.63	2.94	1.23
Lymphocyte% auto			42.3	69.5	43.7	42.9	39.1	55.6	58.6	69.4	36.3	61.2	59	44.5	73.4	58.9	48.4	67.8	78.5	71.4	63.6	76.3	56.4	76.8	32.8	68
Monocyte% auto			4	5.7	6.8	6.3	5	7.1	1.8	1.6	7.4	5.9	4	1.7	1.2	2	9.4	8.9	0.5	4.5	7.8	5.5	6.8	0.7	7.1	3.7
Neutrophil% auto			53.7	24.7	49.5	50.8	56	37.3	39.6	29	56.3	32.8	37	53.8	25.3	39.1	42.2	23.3	21	24	28.9	18.2	36.9	22.5	60.1	28.3
RBC (10ˆ12/L)			5.98	10.13	11.55	9.31	12.37	8.07	5.42	10.94	11.43	10.84	3.89	9.57	9.74	11.03	10.99	6.89	13.3	10.52	10.61	7.33	10.94	11.25	9.42	10.28
HGB (g/dL)			7.8	13.9	15	12.6	13.7	10.1	7.2	14.3	14	14.7	4.4	11.5	12.9	13.9	13.7	9.5	13.9	13.7	13.1	9.5	13.9	14.1	11.5	13.1
HCT (%)			31.01	53.71	57.03	47.46	50.69	42.09	28.27	56.47	55.95	55.98	18.58	47.92	49.82	53.59	51.24	35.18	52.45	52.69	53.5	37.91	54.84	54.45	43.89	51.9
MCV (fl)			52	53	49	51	41	52	52	52	49	52	48	50	51	49	47	51	43	50	50	52	50	48	47	51
MCH (pg)			13	13.7	13	13.5	11.1	12.5	13.2	13.1	12.3	13.6	11.4	12.1	13.2	12.6	12.4	13.7	11.3	13	12.3	13	12.7	12.5	12.2	12.8
MCHC (g/dL)			25	25.8	26.4	26.6	27.1	24	25.4	25.3	25	26.2	23.9	24.1	25.8	25.9	26.7	26.9	26.5	25.9	24.4	25.1	25.3	25.8	26.1	25.3
RDWc (%)			19.4	19.4	21.2	20	24.1	18.8	18	20.5	21	19.9	20.1	21.2	20.8	24.2	22.3	20.3	28.4	22	26	20.9	21.2	21.3	20.8	20.8
RDWs (fl)			37.5	38.3	38.3	37.5	35.9	36.7	35.2	39.1	37.5	38.3	35.9	39.1	39.1	43	28.3	38.3	44.5	40.6	49.2	38.3	39.1	37.5	35.9	39.1
Platelets (10ˆ9/L)			90	163	349	249	163	61	172	399	466	256	49	243	271	300	304	87	216	214	312	141	339	241	136	176
MPV (fl)			10.4	8.9	8.2	8.2	6.5	7	8.7	8.5	9	8.9	7.6	9	8.8	8.1	8.7	7.8	5.9	7.3	7.2	9.4	9.1	7.6	7.2	8
PCT (%)			0.09	0.14	0.28	0.2	0.11	0.04	0.15	0.34	0.42	0.23	0.04	0.22	0.24	0.24	0.26	0.07	0.13	0.16	0.22	0.13	0.31	0.18	0.1	0.14
PDWc (%)			39.6	39.6	37.7	39	31	32	38.4	39.6	39.6	39.6	35	39.6	37.8	36.9	38.4	35.6	28.4	34.5	36.9	38.5	39.6	36.9	35.5	37.7
PDWs (fl)			18	16.6	14	15.7	8.4	9.8	14.9	16.6	16.6	16.6	12.3	16.6	15.4	13.2	14.9	12.9	7	10.9	13.2	16.3	16.6	13.2	11.8	14

## Sheet: WK-4
C3HeB/FeJ data
CBC	UnRx						BPa							BPaL							BPaS						L						S
Parameters	M1	M2	M3	M4	M5	M6	M1	M2	M3	M4	M5	M6	M7	M1	M2	M3	M4	M5	M6	M7	M1	M2	M3	M4	M5	M6	M1	M2	M3	M4	M5	M6	M1	M2	M3	M4	M5
WBC (10ˆ9/L)		5.14	6.52	8.19	4.38	12.52	4.73	2.55	5.65	7.41	3.98	5.76	6.23	3.84	6.33	5.69	7.31	4.76	4.88	5.93	3.78	2.85	4.27	4.86	6.26	4.46	4.59	7.73	5.19	4	5.44	5.39	5.76	7.3	3.35	4.61	3.7
Lymphocyte (10ˆ9/L)		1.99	3.74	3.31	2.66	2.39	3.04	2.06	4.55	2.89	2.99	2.73	2.77	2.66	2.75	2.94	5.38	3.66	1.84	3.75	2.2	2.34	2.21	2.94	2.91	2.6	3.27	6.17	3.33	2.62	3.84	2.16	3.84	2.39	1.55	1.82	2.36
Monocyte (10ˆ9/L)		0.51	0.4	0.77	0.3	1.4	0.18	0.04	0.07	0.68	0.21	0.42	0.1	0.08	0.69	0.3	0.03	0.17	0.64	0.46	0.27	0.19	0.29	0.04	0.65	0.39	0.24	0.17	0.36	0.28	0.27	0.39	0.39	0.55	0.37	0.21	0.16
Neutrophil (10ˆ9/L)		2.64	2.38	4.11	1.42	8.74	1.52	0.45	1.04	3.83	0.78	2.61	3.35	1.1	2.89	2.45	1.89	0.93	2.41	1.71	1.31	0.32	1.77	1.88	2.7	1.48	1.08	1.39	1.5	1.1	1.33	2.84	1.53	4.36	1.43	2.57	1.18
Lymphocyte% auto		38.6	57.4	40.4	60.7	19.1	64.2	80.9	80.4	39	75.1	47.4	44.5	69.3	43.5	51.7	73.7	77	37.7	63.6	58.2	82.2	51.8	60.6	46.5	58.2	71.2	79.8	64.2	65.5	70.7	40	66.7	32.8	46.4	39.5	63.7
Monocyte% auto		9.9	6.1	9.4	6.8	11.2	3.7	1.5	1.2	9.2	5.3	7.3	1.7	2.1	10.8	5.3	0.5	3.5	13	7.8	7.2	6.7	6.7	0.7	10.5	8.7	5.2	2.2	6.9	7	4.9	7.3	6.8	7.5	11.1	4.6	4.4
Neutrophil% auto		51.4	36.5	50.2	32.5	69.8	32.1	17.6	18.4	51.7	19.6	45.3	53.8	28.6	45.7	43	25.8	19.5	49.2	28.9	34.6	11.1	41.4	38.7	43.1	33.1	23.6	18	28.8	27.5	24.4	52.7	26.6	59.7	42.5	55.8	31.9
RBC (10ˆ12/L)		11.41	11.04	10.53	10.42	12.75	10.02	4.98	10.15	11.07	9.59	10.34	9.57	8.68	10.7	10.39	9.11	9.41	9.84	10.61	9.91	10.17	9.04	9.04	11.23	9.55	11.13	10.62	10.52	10.26	10.81	11.01	10.16	12.28	10.92	9.16	7.68
HGB (g/dL)		14	13.8	13.4	13.7	13.2	12.8	5.9	13.4	13.4	12.2	13.1	11.5	10.6	12.8	12.2	10.3	12.2	12.7	13.1	13.1	13.4	10.7	10.9	13.4	12	13.6	14.1	13.2	13.4	14.3	14.2	13.9	14.1	13.9	11.5	9.5
HCT (%)		55.91	54.24	53.99	53.92	48.75	50.92	25.53	54.27	53.16	49.7	53.22	47.92	45.91	54.74	50.57	44	49.61	51.76	53.5	53.53	55.2	45.73	46.55	55.21	50.47	55.85	57.37	54.21	55.88	59.8	56.79	57.96	55.45	57.67	49.29	39.61
MCV (fl)		49	49	51	52	38	51	51	53	48	52	51	50	53	51	49	48	53	53	50	54	54	51	57	49	53	50	54	52	54	55	52	57	45	53	54	52
MCH (pg)		12.3	12.5	12.7	13.2	10.3	12.8	11.9	13.2	12.1	12.8	12.6	12.1	12.2	11.9	11.7	11.3	12.9	12.9	12.3	13.2	13.2	11.9	12	12	12.6	12.2	13.3	12.5	13	13.2	12.9	13.7	11.5	12.7	12.5	12.4
MCHC (g/dL)		25.1	25.4	24.7	25.5	27	25.2	23.2	24.7	25.2	24.6	24.6	24.1	23.1	23.3	24.1	23.4	24.5	24.6	24.4	24.5	24.4	23.5	23.3	24.3	23.8	24.3	24.6	24.3	23.9	23.8	24.9	24	25.5	24.1	23.3	24.1
RDWc (%)		21.9	21.9	19.7	19.1	24.1	20.3	21.3	19.4	22	19.4	18.9	21.2	21.5	22.7	23	28.9	20.7	21.5	26	20.4	19.6	20.6	19.7	21	19.1	24.8	20.9	21.6	21.6	20.6	21.3	19.3	21.5	19.6	18.3	18.6
RDWs (fl)		39.1	39.1	37.5	36.7	33.6	38.3	40.6	38.3	38.3	37.5	35.9	39.1	42.2	43	41.4	51.6	40.6	42.2	49.2	40.6	39.1	38.3	37.5	37.5	37.5	46.1	42.2	41.4	43.8	42.2	40.6	40.6	35.9	38.3	36.7	35.9
Platelets (10ˆ9/L)		403	379	334	290	223	368	141	359	494	334	271	243	222	346	328	155	251	347	312	343	256	285	134	407	246	300	213	241	324	311	397	233	336	403	323	220
MPV (fl)		8.2	7.2	6.9	7.3	5.9	7.4	8	8.4	8.2	7.8	7.9	9	7.5	6.9	7	8	7.8	6.9	7.2	7.5	7.7	6.9	8.2	7.4	8	6.7	7.5	6.7	7.8	7.3	7.5	7.7	7.2	8.2	7.9	7.7
PCT (%)		0.33	0.27	0.23	0.21	0.13	0.27	0.11	0.3	0.41	0.26	0.21	0.22	0.17	0.24	0.23	0.12	0.2	0.24	0.22	0.26	0.2	0.2	0.11	0.3	0.2	0.2	0.16	0.16	0.25	0.23	0.3	0.18	0.24	0.33	0.26	0.17
PDWc (%)		39.6	33.4	31.9	34.8	28.4	34.5	39	35.5	39.6	35.5	34.8	39.6	32.3	33.8	35.2	36.9	33.1	31.4	36.9	33.4	33.1	31.4	39	32.7	34.8	29.5	36.6	33.8	35.2	31.9	32.7	31.9	35.5	33.4	36.6	32.3
PDWs (fl)		16.6	10.1	9	11.2	7	10.9	15.7	11.8	16.6	11.8	11.2	16.6	9.3	10.4	11.5	13.2	9.8	8.7	13.2	10.1	9.8	8.7	15.7	9.5	11.2	7.6	12.9	10.4	11.5	9	9.5	9	11.8	10.1	12.9	9.3
