# Supplementary material for: A modified BPaL regimen for tuberculosis treatment replaces linezolid with inhaled spectinamides
Source: eLife. 2024 Oct 8;13:RP96190. doi: 10.7554/eLife.96190 (PMC11460978; doi:10.7554/eLife.96190)
Supplement: Figure 3—source data 2. [file elife-96190-fig3-data2.xlsx]

## Sheet: Sheet1
C3HeB/FeJ data
Slide	Myeloid	Erythroid	M:E	Megas	Myeloid maturation							M	E
UnRx_M1	242.5	57.5	4.21739	Adequate	Adequate
UnRx_M2	253	47	5.38298	Adequate	Adequate
UnRx_M3	253	47	5.38298	Adequate	Adequate
UnRx_M4	220	80	2.75	Adequate	Adequate
UnRx_M5	243	57	4.26316	Adequate	Adequate
UnRx_M6	216.5	83.5	2.59281	Adequate	Adequate
UnRx_M7	244	56	4.35714	Adequate	Adequate
UnRx_M8	250	50	5	Adequate	Adequate
BPa_M1	215	85	2.52941	Adequate	Adequate
BPa_M2	217.5	82.5	2.63636	Adequate	Adequate
BPa_M3	197	103	1.91262	Adequate	Adequate
BPa_M4	193	107	1.80374	Adequate	Adequate
BPa_M5	209.5	90.5	2.31492	Adequate	Adequate
BPaL_M1	245	55	4.45455	Adequate	Adequate
BPaL_M2	197.5	102.5	1.92683	Adequate	Adequate
BPaL_M3	197.5	102.5	1.92683	Adequate	Adequate
BPaL_M4	175.5	124.5	1.40964	Adequate	Adequate
BPaS_M1	221	79	2.79747	Adequate	Adequate
BPaS_M2	221	79	2.79747	Adequate	Adequate
BPaS_M3	249	51	4.88235	Adequate	Adequate
