# Supplementary material for: A modified BPaL regimen for tuberculosis treatment replaces linezolid with inhaled spectinamides
Source: eLife. 2024 Oct 8;13:RP96190. doi: 10.7554/eLife.96190 (PMC11460978; doi:10.7554/eLife.96190)
Supplement: Figure 5—source data 1. [file elife-96190-fig5-data1.xlsx]

## Sheet: Lung_%
	CD45+CD3+	CD45+CD3+NKp46	CD45+CD3+CD4-CD8+	CD45+CD3+CD4+CD8+	CD45+CD3+CD4+CD8-	CD45+CD3+CD4-CD8-	CD45+CD3+CD4-CD8-gd-TCR	CD45+CD3-	CD45+CD3-NKcells	CD45+CD3-CD11b-CD11c+	CD45+CD3-CD11b-CD11c+MHC-II-CCR2+	CD45+CD3-CD11b-CD11c+MHC-II+CCR2+	CD45+CD3-CD11b-CD11c+MHC-II+CCR2-	CD45+CD3-CD11b-CD11c+MHC-II-CCR2-	CD45+CD3-CD11b+CD11c+	CD45+CD3-CD11b+CD11c+MHC-II-CCR2+	CD45+CD3-CD11b+CD11c+MHC-II+CCR2+	CD45+CD3-CD11b+CD11c+MHC-II+CCR2-	CD45+CD3-CD11b+CD11c+MHC-II-CCR2-	CD45+CD3-CD11b+CD11c-	CD45+CD3-CD11b+CD11c-LY6C+LY6G+	CD45+CD3-CD11b+CD11c-LY6C+LY6G+MHC-II-CCR2+	CD45+CD3-CD11b+CD11c-LY6C+LY6G+MHC-II+CCR2+	CD45+CD3-CD11b+CD11c-LY6C+LY6G+MHC-II+CCR2-	CD45+CD3-CD11b+CD11c-LY6C+LY6G+MHC-II-CCR2-	CD45+CD3-CD11b+CD11c-LY6C-LY6G-	CD45+CD3-CD11b+CD11c-LY6ChighLY6G-	CD45+CD3-CD11b+CD11c-LY6ChighLY6G-MHC-II-CCR2+	CD45+CD3-CD11b+CD11c-LY6ChighLY6G-MHC-II+CCR2+	CD45+CD3-CD11b+CD11c-LY6ChighLY6G-MHC-II+CCR2-	CD45+CD3-CD11b+CD11c-LY6ChighLY6G-MHC-II-CCR2-	CD45+CD3-CD11b+CD11c-LY6CmidLY6G-	CD45+CD3-CD11b+CD11c-LY6CmidLY6G-MHC-II-CCR2+	CD45+CD3-CD11b+CD11c-LY6CmidLY6G-MHC-II+CCR2+	CD45+CD3-CD11b+CD11c-LY6CmidLY6G-MHC-II+CCR2-	CD45+CD3-CD11b+CD11c-LY6CmidLY6G-MHC-II-CCR2-	CD45+CD3-CD11b+CD11c-CD14-CCR2+	CD45+CD3-CD11b+CD11c-CD14+CCR2+	CD45+CD3-CD11b+CD11c-CD14+CCR2+MHC-II	CD45+CD3-CD11b+CD11c-CD14+CCR2-	CD45+CD3-CD11b+CD11c-CD14+CCR2-MHC-II	CD45+CD3-CD11b+CD11c-CD14-CCR2-	CD45+CD3-CD11b-CD11c-	CD45+CD3-CD11b-CD11c-CCR2-MHC-II+	CD45+CD3-CD11b-CD11c-CCR2+MHC-II+	CD45+CD3-CD11b-CD11c-CCR2+MHC-II-	CD45+CD3-CD11b-CD11c-CCR2-MHC-II-	CD45+CD3-CD19-B220+	CD45+CD3-CD19-B220+MHC-II-CCR2+
UnRx_M1	43.8	0.31	17.1	1.39	19.4	5.95	2.66	55.5	9.92	7.24	0.4	0.86	2.97	3.01	19.3	0.82	3.92	10.9	3.69	13.7	3.28	0.25	0.013	0.29	2.72	4.09	3.86	1.31	0.53	0.28	1.74	2.36	0.067	0.099	0.34	1.85	0.65	1.65	0.48	2.82	0.35	8.57	15.2	8.37	1.06	1.34	4.48	12.5	2.19
UnRx_M2	37	0.17	16.9	0.48	16.1	3.44	1.76	62.8	4.24	3.55	0.16	0.24	1.67	1.48	25.7	1.04	4.25	13.8	6.6	25.3	15	0.74	0.079	1.69	12.5	2.79	4.46	2.18	1.04	0.41	0.83	1.7	0.16	0.11	0.46	0.96	1.23	3.09	0.93	10.8	1.39	10.1	8.27	4.5	0.41	0.55	2.8	11.1	2.62
UnRx_M3	33	0.29	15.5	0.36	12.1	5.03	2.56	66.7	2.01	2.04	0.065	0.29	0.68	1.01	13.2	0.84	2.72	7.23	2.43	41.3	32.1	1.52	0.42	2.69	27.4	1.56	4.05	2.46	0.88	0.32	0.39	1.39	0.097	0.16	0.55	0.58	2.5	3.02	0.97	20	1.75	15.8	10.1	3.6	0.58	1.43	4.44	11	3.57
UnRx_M4	25.3	1.38	11.3	0.087	10.4	3.55	3.14	74.5	2.73	1.43	0	0.065	0.43	0.93	17.2	1.34	1.38	6.81	7.68	51.6	30.3	1.19	0.5	5	23.6	2.47	12.7	2.27	0.28	2.1	8	5	0.39	0.11	0.76	3.74	0.71	3.76	0.65	33.8	5.6	13.3	4.28	0.48	0.043	0.17	3.59	6.16	1.54
UnRx_M5	28.4	0.44	9.34	0.68	13.5	4.84	3.23	71.2	7.32	3.54	0.23	0.46	1.37	1.48	25	2.49	6.72	9.68	6.08	33.5	19.6	2.29	0.44	2.11	14.8	3.61	7.17	3.64	1.95	0.33	1.26	2.46	0.077	0.14	0.62	1.62	1	7.43	2.41	14.3	1.85	10.8	9.16	4.95	0.33	0.57	3.3	18.7	5.72
BPa_M1	36.6	1.13	6.07	0.36	21	9.19	4.17	62.8	10.8	3.64	0.24	0.57	1.28	1.54	18.4	0.96	3.04	6.24	8.14	25.3	12	0.22	0.022	0.92	10.8	4.4	4.32	1.37	0.49	0.27	2.19	2.72	0.043	0.11	0.47	2.09	0.49	1.74	0.47	10	0.77	13.1	15.4	9.99	0.45	0.62	4.37	10.6	1.99
BPa_M2	40.6	0.79	10	0.4	23.8	6.36	2.85	58.8	13.1	6.04	0.38	0.91	2.16	2.6	16	1.41	3.16	6.27	5.19	20	5.32	0.26	0.038	0.34	4.68	5.21	5.57	2.23	0.61	0.14	2.59	3.73	0.14	0.14	0.33	3.13	1.3	2.09	0.36	4.38	0.29	12.2	16.8	8.23	0.86	1.74	5.94	13.7	3.56
BPa_M3	40	0.82	9.7	0.37	23.4	6.45	3.13	59.1	12.9	5.21	0.38	0.64	1.9	2.28	16	1.81	2.61	5.39	6.22	18.6	5.59	0.36	0.042	0.28	4.91	4.93	4.52	1.43	0.24	0.17	2.69	3.41	0.12	0.079	0.35	2.87	0.73	1.5	0.21	4.47	0.21	11.9	19.3	12.5	0.67	0.87	5.19	12.3	2.57
BPa_M4	43.3	0.67	9.74	0.53	26.3	6.71	4.19	56.1	9.75	4.29	0.21	0.45	1.54	2.09	21.8	1.73	4.73	8.33	7.04	19.9	9.24	0.72	0.087	0.48	7.95	4.12	3.93	1	0.63	0.2	2.1	2.11	0.064	0.032	0.37	1.65	0.29	2.18	0.64	7.73	0.46	9.65	10.1	5.14	0.33	0.5	4.18	13.1	2.15
BPa_M5	37.5	0.93	9.12	0.44	21.5	6.45	2.82	61.8	13.1	4.42	0.18	0.46	1.8	1.99	17.1	1.42	2.89	6.22	6.55	24.4	10.6	0.51	0.11	0.73	9.27	5.2	4.69	1.08	0.38	0.29	2.94	3.38	0.057	0.082	0.57	2.67	0.46	1.7	0.45	9.08	0.57	13.1	15.9	9.41	0.46	0.79	5.24	12.7	1.97
BPa_M6	19.9	0	5.15	0	9.56	5.15	3.68	80.1	6.62	5.15	0.74	0	1.47	2.94	16.9	2.21	3.68	5.88	5.15	30.1	18.4	0.74	0	1.47	16.2	2.94	2.21	0	0	0	2.21	5.88	0	0	5.88	0	0	0.74	0	13.2	1.47	16.2	27.9	16.9	2.21	0	8.82	9.56	0.74
BPa_M7	19.3	0.48	4.96	0.071	10.6	3.69	2.1	80.4	5.25	1.43	0.057	0.19	0.54	0.64	12.7	0.83	1.28	4.53	6.03	58.7	41.4	0.78	0.014	1.7	38.9	4.33	2.74	0.78	0.36	0.43	1.17	2.85	0.071	0.071	0.5	2.21	0.61	1.54	0.37	25.7	1.33	30.8	7.63	3.14	0.13	0.29	4.08	6.07	1.04
BPaL_M1	45.6	0.86	9.37	2.68	29.7	3.82	1.86	53.8	9.59	2.71	0.1	0.26	1.15	1.21	12.3	0.63	1.5	4.79	5.43	27.6	7.38	0.18	0.02	0.46	6.72	11.9	3.28	0.61	0.18	0.31	2.18	4.86	0.11	0.084	1.78	2.89	0.57	0.67	0.12	6.76	0.42	19.6	11.2	7.26	0.34	0.5	3.06	9.31	0.95
BPaL_M2	32	0.37	7.3	0.17	20.9	3.68	1.97	67.5	5.8	2.37	0.091	0.26	1.05	0.97	12.1	0.66	1.48	4.78	5.17	32.5	19.8	0.43	0.11	2.79	16.5	5.11	3.09	1.09	0.24	0.51	1.26	3.49	0.028	0.063	2.18	1.22	0.34	1.54	0.3	15.8	1.97	14.8	20.6	16.8	0.69	0.28	2.79	7.92	1.56
BPaL_M3	38.5	0.54	6.51	0.72	23.4	7.84	4.88	61	11.8	3.83	0.17	0.58	1.19	1.9	17.4	0.74	4.19	6.67	5.85	25.7	10.9	0.25	0.13	1.72	8.78	4.92	5.98	1.92	1.22	0.54	2.29	3.31	0.075	0.3	0.84	2.09	1.18	2.76	1.02	8.91	1.6	12.8	14	8.19	0.38	0.56	4.87	11.9	2.22
BPaL_M4	36.5	1	8.06	1.11	21.4	5.95	4.06	63.1	7.16	2.51	0.053	0.18	0.91	1.36	17.1	1.22	2.3	6.17	7.43	37.2	20.1	0.54	0.079	2.22	17.3	7.33	5.15	1.23	0.28	0.71	2.93	3.78	0.13	0.13	1.14	2.38	0.45	1.89	0.4	18.4	2	16.4	6.28	2.85	0.12	0.16	3.14	11.5	1.69
BPaL_M5	24.3	3.57	4.82	0.91	13.4	5.16	2.32	75.2	11.4	2.17	0.16	0.21	0.5	1.31	12.8	1.41	1.45	3.55	6.36	45.2	16.2	0.64	0.043	0.96	14.5	12.4	8.86	3.24	0.37	0.63	4.62	7.41	0.53	0.16	2.11	4.61	1.86	3.2	0.25	15.3	0.72	24.9	15.1	5.05	0.3	0.8	8.92	10.2	2.88
BPaL_M6	36.6	1.01	7.81	0.46	20.8	7.48	4.11	62.7	5.86	2.63	0.1	0.18	1.12	1.22	19.1	1.76	2.74	7.21	7.42	27	14.3	0.58	0.11	1.56	12.1	6.43	2.81	0.72	0.2	0.31	1.58	2.64	0.085	0.072	0.87	1.62	0.33	1.41	0.29	11.7	1.23	13.6	14	9.55	0.44	0.43	3.58	9.99	1.77
BPaL_M7	31.8	1.28	10.9	0.34	15.4	5.16	2.48	67.5	7.28	3.32	0.1	0.37	1.43	1.42	10.9	0.55	1.76	4.7	3.85	20.9	9.12	0.2	0.08	1.41	7.42	5.07	2.62	0.7	0.25	0.55	1.11	3.09	0.05	0.063	1.63	1.34	0.32	1.02	0.28	6.79	0.96	12.8	32.4	24.6	0.98	0.5	6.35	7.1	0.96
BPaS_M1	34.6	2.06	8.12	1.02	19.1	6.35	1.58	64.4	10.2	7.87	0.39	0.87	2	4.6	13.9	1.32	2.08	5.42	5.07	19.9	5.85	0.53	0.069	0.32	4.93	5.17	3.71	1.38	0.29	0.3	1.74	4.89	0.31	0.21	1.41	2.95	1.33	1.46	0.23	4.5	0.21	12.6	22.7	9.01	1.47	3.84	8.37	11	2.72
BPaS_M2	43.3	2.2	11.6	0.51	24.7	6.43	1.86	56.1	6.09	7.76	0.32	0.94	3.55	2.96	10	0.56	1.19	4.75	3.51	7.65	1.38	0.058	0	0.077	1.24	2.85	1.42	0.38	0.1	0.077	0.86	1.93	0.1	0.082	0.37	1.37	0.53	0.24	0.029	1.11	0.048	5.78	30.7	20.6	1.87	2.25	6.01	4.74	0.87
BPaS_M3	32.7	1.17	5.87	0.27	20.4	6.11	2.67	66.8	10.4	4.39	0.22	0.56	1.32	2.29	24.4	1.46	3.67	8.38	10.8	26	13.2	0.36	0.081	0.86	11.9	4.53	3.98	1.52	0.61	0.24	1.61	3.16	0.065	0.13	0.51	2.46	0.76	2.04	0.58	9.79	0.71	13.4	12	5.78	0.26	0.69	5.26	11	2.45
BPaS_M4	33.9	0.68	7.77	0.47	19.4	6.27	3.44	65.4	13.5	4.42	0.24	0.54	1.56	2.09	15.7	1.23	2.86	5.12	6.46	31.4	16	0.59	0.071	1.05	14.3	5.28	6.15	2.35	0.77	0.36	2.67	3.38	0.051	0.14	0.53	2.67	0.54	3.37	0.78	14.3	0.98	13.2	13.9	7.49	0.44	0.87	5.11	13.1	3.12
BPaS_M5	36	0.56	6.85	0.49	23.2	5.39	2.94	63.3	8.81	3.72	0.23	0.6	1.35	1.53	18.6	1.02	3.55	7.08	6.99	29.1	15.4	0.26	0.068	1.41	13.7	4.19	5.3	2.43	0.89	0.21	1.77	2.62	0.06	0.051	0.61	1.9	0.5	3.19	0.81	12.4	1.06	13.1	11.8	6.99	0.32	0.57	3.87	11.8	3.19
BPaS_M6	31.3	0.68	7.24	0.28	17.7	6.04	2.53	67.4	13.3	4.69	0.32	0.69	1.5		20.2	1.24	4.22	7.75		24.4	8.2	0.2	0.088	0.95		6.57	5.48	2.25	0.89	0.3		3.68	0.1	0.097	0.83		0.84	2.76	0.82	6.36	0.73	14.4	18.2	11.9	0.53	1.1	4.64	12	2.97
[truncated: 29 more columns]

## Sheet: Blood_%
	CD45+	CD45+CD3+	CD45+CD3+NKp46	CD45+CD3+CD4+CD8-	CD45+CD3+CD4-CD8-	CD45+CD3+CD4-CD8-gd-TCR	CD45+CD3-	CD45+CD3-NKcells	CD45+CD3-CD11b-CD11c+	CD45+CD3-CD11b+CD11c+	CD45+CD3-CD11b+CD11c-	CD45+CD3-CD11b+CD11c-LY6C+LY6G+	CD45+CD3-CD11b+CD11c-LY6C-LY6G-	CD45+CD3-CD11b+CD11c-LY6ChighLY6G-	CD45+CD3-CD11b+CD11c-LY6ChighLY6G-MHC-II-CCR2-	CD45+CD3-CD11b+CD11c-LY6CmidLY6G-	CD45+CD3-CD11b+CD11c-LY6CmidLY6G-MHC-II-CCR2-	CD45+CD3-CD11b+CD11c-CD14-CCR2+	CD45+CD3-CD11b+CD11c-CD14+CCR2+	CD45+CD3-CD11b+CD11c-CD14+CCR2+MHC-II	CD45+CD3-CD11b+CD11c-CD14+CCR2-	CD45+CD3-CD11b+CD11c-CD14+CCR2-MHC-II	CD45+CD3-CD11b+CD11c-CD14-CCR2-	CD45+CD3-CD11b-CD11c-	CD45+CD3-CD11b-CD11c-CCR2-MHC-II+	CD45+CD3-CD11b-CD11c-CCR2+MHC-II+	CD45+CD3-CD11b-CD11c-CCR2+MHC-II-	CD45+CD3-CD11b-CD11c-CCR2-MHC-II-	CD45+CD3-CD19-B220+	CD45+CD3-CD19-B220+MHC-II-CCR2+	CD45+CD3-CD19-B220+MHC-II+CCR2+	CD45+CD3-CD19-B220+MHC-II+CCR2-	CD45+CD3-CD19-B220+MHC-II-CCR2-	CD45+CD3-CD19+B220+	CD45+CD3-CD19+B220+MHC-II	CD45+CD3-CD19-B220-	CD45+CD3-CD19-B220-MHC-II-CCR2+	CD45+CD3-CD19-B220-MHC-II+CCR2+	CD45+CD3-CD19-B220-MHC-II+CCR2-	CD45+CD3-CD19-B220-MHC-II-CCR2-	CD45+CD34+	CD45+CD34-	CD45+TER119+	CD45+TER119-	CD45-CD34-	CD45-CD34-CD4-CD8-	CD45-CD34-CD14-CCR2+	CD45-CD34-CD14-CCR2-	CD45-CD34-CD19-B220+
UnRx_M1	23.1	43.1	7.73	21.4	15.5	5.18	55.4	19.7	1.37	2.85	37	24.4	5.46	3.44	2.24	3.44	2.63	0.65	5.15	1.35	19.6	2.64	11.6	14.2	9.45	0.34	3.12	1.29	19.9	2.21	1.35	2.46	13.9	10.8	10.7	24.3	3.37	1.77	3.67	15.5	2.92	96.9	3.56	95.8	100	98.6	2.6	97.3	2.46
UnRx_M2	78	46.6	10.6	23.7	15.4	5.08	52.6	22	1.82	4.76	29.8	15.2	6.26	4.37	2.39	3.91	3.04	1.08	5.86	1.7	10.5	1.54	12.4	16.3	10.9	0.57	3.26	1.5	20.3	2.62	1.93	2.42	13.3	12.8	12.5	19	3.06	2.41	2.87	10.6	4.03	95.9	1.2	98.5	99.4	95.7	17.2	81.8	35.8
UnRx_M3	68.5	43.4	8.66	20	17	5.08	55.4	24.8	2.01	3.19	27.9	14.8	5.63	4.06	2.78	3.26	2.64	1.07	4.55	0.88	10.2	1.01	12.1	22.3	17.9	0.71	2.14	1.56	17.6	2.39	1.19	1.75	12.3	20	19.9	17.6	2.55	1.85	2.62	10.6	3.62	96.2	0.74	99	99.7	97.7	11.2	88.3	10.1
UnRx_M4	56.8	49.5	8.91	16.2	27	13.8	49.6	24.5	2.55	3.03	20.9	5.98	3.79	4.42	2.31	6.63	4.24	2.36	3.43	1.87	4.14	1.05	11	23	16.3	3.23	1.51	2.05	16.9	2.27	2.28	2.1	10.3	21.5	21.4	10.9	1.25	2.44	1.73	5.49	4.6	95.2	6.29	92.6	99.8	95.1	19.7	79.9	31.4
UnRx_M7	32.6	48.2	5.03	16.9	15.8	5.95	50.7	19.8	1.64	2.02	30.5	16.5	5.8	4.48	2.42	3.53	2.68	1.05	7.68	2.38	10.6	1.2	11.2	16.6	10.7	0.53	2.1	3.25	19.6	3.31	1.74	1.3	13.3	12.4	12.3	17.9	2.17	2.49	1.55	11.7	3.45	96.4	1.26	98.6	100	99.5	1.95	98	2.18
UnRx_M8	43	44.7	6.63	11.2	28.2	9.68	54.1	23	2.64	2.6	37.6	24.1	6.02	4.42	1.96	2.94	2.09	0.96	9.99	2.89	16.2	1.32	10.4	11.3	7.17	0.36	1.02	2.74	25.1	4.04	2.42	1.62	17	8.39	8.31	20.2	2.02	2.52	1.78	13.9	2.89	97	2.32	97.4	100	99.5	1.9	98	2.75
BPa_M1	55.9	50	3.57	23.2	13.5	4.34	49.2	21.5	1.5	1.93	18.3	8.07	3.26	2.69	1.79	4.14	3.28	1.02	1.23	0.53	7.12	0.74	8.91	27.5	23.2	0.44	1.48	2.4	10.7	1.07	0.65	0.92	8.05	24.6	24.4	13.8	1.46	0.83	1.57	9.92	4.03	95.8	0.51	99.4	99.9	98.6	8.39	91.4	17.2
BPa_M3	70	56.7	9.49	34.8	11.6	2.26	42.5	24.2	1.38	1.94	29.9	11.2	8.52	5.29	4.69	4.84	4.56	0.44	2.04	0.38	9.16	0.44	18.2	9.31	5.08	0.083	1.84	2.31	15.6	1.04	0.4	0.89	13.3	5.4	5.35	21.3	1.93	0.55	1.38	17.5	4.36	95.5	0.43	99.4	99.8	98.8	5.86	93.6	3.94
BPa_M4	79.5	49	6.76	27	12.1	2.56	50.3	24.9	1.82	1.27	25.7	17.4	3.23	2.47	1.93	2.4	2.12	0.31	3.62	0.43	13.5	0.47	8.24	21.5	18.9	0.42	0.91	1.27	15.2	1.88	0.53	0.61	12.1	20.8	20.7	14	1.27	0.67	0.73	11.3	5.59	94.2	0.79	99	99.8	99.2	8.65	91.1	22.3
BPaL_M1	65.4	46.5	6.09	21.4	17.7	3.92	52.7	15.9	1.28	1.33	38.1	29.8	3.34	2.64	1.77	2.04	1.74	0.67	6.11	0.68	23	1.37	8.31	12	8.5	0.12	1.4	1.95	19.6	2.66	0.75	1.11	15	9.79	9.56	22.9	2.55	0.83	2.03	17.5	3.58	96.3	0.96	98.7	99.8	99.1	3.69	95.9	4.36
BPaL_M2	64.8	51.5	8.54	24.7	19.1	4.63	47.7	19.6	1.16	2.38	32.1	19	5.53	3.64	2.68	3.84	3.29	0.63	3.16	0.67	15.9	1.16	12.4	12	9.32	0.22	1.07	1.41	17.7	1.39	0.56	1.38	14.4	10.1	10.1	19.6	1.53	1.26	1.96	14.8	3.55	96.3	0.35	99.5	99.9	99.3	9.41	90.3	17.9
BPaL_M3	30.5	49	5.75	23.8	18.1	5.19	50	20.2	1.35	2.34	35.1	21.6	5.09	4.57	3.52	3.7	3.45	0.69	2.38	0.71	18.8	1.83	13.2	11.1	7.8	0.15	1.14	2.07	19.6	0.99	0.77	1.79	16	8.32	8.23	21.9	1.41	1.18	2.46	16.9	3.43	96.4	0.52	99.3	100	99.8	0.96	99	4.19
BPaL_M4	18.9	46.7	3.95	24.3	15.3	4.39	52.5	23.3	1.28	2.34	31.4	17.7	4.95	3.81	3.15	4.76	4.51	0.55	1.9	0.3	15.4	1.31	13.5	17.5	12.3	0.24	1.36	3.51	19.3	0.97	0.48	1.43	16.4	13.1	12.8	19.3	1.1	0.63	1.75	15.8	3.73	96.1	0.43	99.4	100	99.9	1.04	98.9	4.47
BPaS_M1	73.1	46.7	5.91	25.1	13.1	3.82	52.5	19.8	1.73	2.38	34.1	23.9	4.21	3.33	2.44	2.46	2.11	0.71	4.72	0.65	19.1	0.5	9.55	14.3	10.6	0.41	1.37	1.94	19.3	2.15	0.74	0.58	15.8	11.9	11.8	20.9	1.95	1.35	1.07	16.5	4.89	94.9	1.74	97.7	99.8	97.5	19.4	80.1	9.45
BPaS_M2	65	42.9	7.85	18.7	11.5	2.93	56.3	17.4	1.17	2.88	38.2	26	4.5	4.19	2.49	3.41	3.03	0.95	8.02	1.2	18.1	0.28	11.2	14.1	9.49	0.36	1.63	2.6	25	4.22	1.1	0.54	19.1	10.2	10.1	20.8	2.48	2	1.23	15.1	4.49	95.3	1.55	97.8	99.7	98.1	9.53	90	15.9
BPaS_M3	5.5	34.3	4.2	18.3	10.3	3.92	64.9	23.5	1.17	2.74	48.1	28.1	7.39	6.04	4.68	6.34	5.46	1.5	5.78	1.01	22.8	1.16	18	12.9	5.98	0.32	2.1	4.54	34.1	3.68	0.89	1.56	28	6.24	6.09	24.3	2.44	1.62	1.63	18.6	3.4	96.5	2.11	97.3	100	99.3	4.66	95.3	1.27
[truncated: 3 more columns]

## Sheet: Bonemarrow_%
Groups	CD45+	CD45+CD3+	CD45+CD3+CD4-CD8-	CD45+CD3-	CD45+CD3-NKcells	CD45+CD3-CD11b-CD11c+	CD45+CD3-CD11b+CD11c-	CD45+CD3-CD11b+CD11c-LY6C+LY6G+	CD45+CD3-CD11b+CD11c-LY6C+LY6G+MHC-II-CCR2+	CD45+CD3-CD11b+CD11c-LY6C+LY6G+MHC-II+CCR2+	CD45+CD3-CD11b+CD11c-LY6C+LY6G+MHC-II+CCR2-	CD45+CD3-CD11b+CD11c-LY6C+LY6G+MHC-II-CCR2-	CD45+CD3-CD11b+CD11c-LY6C-LY6G-	CD45+CD3-CD11b+CD11c-LY6ChighLY6G-	CD45+CD3-CD11b+CD11c-LY6ChighLY6G-MHC-II-CCR2+	CD45+CD3-CD11b+CD11c-LY6ChighLY6G-MHC-II+CCR2-	CD45+CD3-CD11b+CD11c-LY6ChighLY6G-MHC-II-CCR2-	CD45+CD3-CD11b+CD11c-LY6CmidLY6G-	CD45+CD3-CD11b+CD11c-LY6CmidLY6G-MHC-II-CCR2-	CD45+CD3-CD11b+CD11c-CD14-CCR2+	CD45+CD3-CD11b+CD11c-CD14+CCR2+	CD45+CD3-CD11b+CD11c-CD14+CCR2+MHC-II	CD45+CD3-CD11b+CD11c-CD14+CCR2-	CD45+CD3-CD11b+CD11c-CD14+CCR2-MHC-II	CD45+CD3-CD11b+CD11c-CD14-CCR2-	CD45+CD3-CD11b-CD11c-	CD45+CD3-CD11b-CD11c-CCR2-MHC-II+	CD45+CD3-CD11b-CD11c-CCR2-MHC-II-	CD45+CD3-CD19-B220+	CD45+CD3-CD19-B220+CCR2-MHC-II-	CD45+CD3-CD19+B220+	CD45+CD3-CD19+B220+MHC-II+CCR2-	CD45+CD3-CD19+B220+MHC-II-CCR2-	CD45+CD3-CD19+B220-	CD45+CD3-CD19-B220-	CD45+CD3-CD19-B220-MHC-II-CCR2+	CD45+CD3-CD19-B220-MHC-II+CCR2+	CD45+CD3-CD19-B220-MHC-II+CCR2-	CD45+CD3-CD19-B220-MHC-II-CCR2-	CD45+TER119-	CD45-	CD45-CD34-	CD45-CD34-CD4-CD8-	CD45-CD34-CD11b+CD11c-	CD45-CD34-CD11b+CD11c-LY6C-LY6G-	CD45-CD34-CD11b+CD11c-CD14-CCR2-	CD45-CD34-CD11b-CD11c-	CD45-CD34-CD19-B220+	CD45-CD34-CD19+B220+
UnRx_M2	77.8	3.08	2.47	96.7	3.37	1.45	67	34.1	2.12	1.57	5.97	24.4	3.42	23.2	1.94	2.04	19	5	3.65	4.31	27.9	6.56	19.7	2.16	15.1	27.5	7.33	18.8	5.71	3.25	22.4	7.53	14.1	1.45	67.1	9.75	5.05	10.5	41.8	99.9	22	99.9	99.7	3.51	2.48	2.51	96.3	1.41	3.29
UnRx_M3	67	4.28	3.35	95.6	19	2.48	63.5	42.1	3.55	2.89	7.6	28.1	3.69	8.03	1.54	1.15	5.03	8.85	7.32	5.33	35.6	9.16	10.8	1.41	11.7	28.8	11.6	15	5.33	2.22	24.2	11.7	10.9	1.19	64.9	14.1	8.16	10	32.7	99.9	32.7	99.9	99.6	3.18	2.55	2.26	96.5	2.04	9.79
UnRx_M5	76.2	2.6	1.84	97.3	1.33	1.37	75	36.5	3.88	1.67	4.12	26.9	2.68	24.4	3.55	1.65	18.7	9.91	8.49	5.06	33.9	6	20.5	1.51	15.6	20.2	7.7	10.6	4.66	2.1	16.1	7.74	7.5	0.87	75.6	15.5	5.27	8.08	46.8	99.9	23.4	99.8	99.4	26.4	19.1	24.8	73.1	1.22	4.58
UnRx_M6	77.1	5.6	4.25	94.2	14	2.7	71.3	44.4	5.13	1.94	4.5	32.8	3.59	18.3	2.33	1.29	14.2	4.11	2.88	5.19	43.6	6.66	12.6	0.97	9.91	18.9	6.55	10.9	4.79	2.35	15.4	7.47	7.15	1.36	72.7	19.6	6.59	7.69	38.8	99.8	22.7	100	99.4	1.17	1.05	0.37	98.6	0.98	0.63
UnRx_M7	66.5	3.76	3.06	96.1	18.3	1.58	64.6	28.2	1.75	1.46	4.56	20.4	4.17	25.5	2.45	2.12	20.6	5.56	4.28	4.18	26.9	5.9	19.1	1.72	14.4	29	9.32	18.4	3.94	2.11	24.6	10.1	13.6	2.33	65.3	10.1	4.72	8.92	41.5	99.8	33.2	99.9	99.7	7.54	5.34	6.55	92.3	1.4	3.22
UnRx_M8	87	3.66	2.92	96.1	8.96	1.57	77.3	27.5	2.67	0.77	2.08	22	2.9	34.8	4.17	0.96	29.2	10.1	9.29	5.41	29.1	3.28	23.2	0.87	19.6	16.7	5.14	9.97	3.33	1.83	10.5	4.76	5.46	1.05	81.2	14.6	3.29	5.41	57.9	99.9	12.8	99.6	98.9	2.53	2.22	1.57	96.9	1.53	2.31
BPa_M1	48.8	10.8	9.99	89.2	24.3	0.91	62.5	51.1	8.52	2	3.39	37.2	4.33	2.38	0.41	0.28	1.62	4.15	3.55	5.45	43.6	4.87	5.02	0.3	8.42	25.3	9.07	15.1	2.6	1.44	20.4	9.22	10.1	3.1	63.1	24.8	5.86	4.32	28.2	99.6	51	100	99.8	1.35	1.27	1.05	98.5	0.69	1.26
BPa_M2	64.1	5.12	4.52	94.8	11.8	1.82	67.5	59.8	3.63	2.28	8.32	45.6	3.19	2.21	0.62	0.42	1.08	1.9	1.07	5.83	46.2	8.03	8.59	1.15	6.9	25	8.16	15.5	3.58	1.71	19.9	9.06	9.66	1.35	70	18.7	7.32	9.37	34.6	99.9	35.7	100	99.8	0.13	0.11	0.058	99.8	0.65	0.00686
BPa_M3	45	5.92	4.91	93.9	8.08	1.65	63.5	27.8	1.51	1.28	4.46	20.5	5.57	19.3	2.34	1.82	14.9	9.82	8.33	4.48	23.8	5.01	16	1.47	19.2	27.4	9.35	16.7	4.66	2.58	24.3	10.3	13.1	1.64	63.4	9.04	4.28	9.27	40.8	100	54.5	100	99.8	15.8	14.2	15.1	83.7	1.89	7.06
BPa_M4	62.6	6.25	5.1	93.6	18.7	3.42	58.3	33.8	2.97	1.15	3.69	26	5.86	15.2	1.71	1.18	12.2	2.59	1.75	3.84	30.9	4.47	12.1	1.01	11.5	30.6	9.24	20.4	4.14	2.29	27.7	12.4	14.1	3.25	58.5	13.5	3.9	6.25	34.8	99.9	37.1	100	99.9	1.07	0.9	0.69	98.8	0.8	1.12
BPa_M5	63.5	7.13	6.37	92.8	21.6	2.2	63.8	42.7	4.35	2.28	5.69	30.4	5.52	11	1.33	1.21	8.15	3.77	2.64	5	39.2	7.35	9.35	1.11	10.3	25.4	7.95	16.2	4.31	2.38	21.9	9.41	11.5	2.51	64.1	17.3	7.03	8.42	31.3	99.8	36.3	100	99.8	1.1	0.9	0.56	98.7	0.89	0.86
BPaL_M1	59.1	4.43	3.35	95.5	5.37	1.52	57.6	50.4	3.12	0.74	2.72	43.8	3.07	1.53	0.69	0.16	0.6	2.14	1.58	3.19	40.1	2.88	7.98	0.42	6.33	35.8	4.16	30.5	2.59	1.43	17.2	4.63	12.1	1.91	73.8	17.1	3.32	4.54	48.9	99.9	40.5	100	99.9	0.035	0.024	0.021	99.9	0.42	0.01
BPaL_M2	55.7	6.02	5.26	93.9	15.2	1.79	59.2	45.4	1.81	1.02	5.41	37.2	6.05	5.39	1.16	0.66	3.42	1.92	1.17	3.33	35.3	5.18	10.9	1.17	9.71	31.8	7.51	23.4	3.92	2.17	23.7	8.75	14.3	1.46	64.9	12.2	4.31	8.28	40	99.9	44	100	99.9	0.13	0.11	0.059	99.8	0.6	0.1
BPaL_M3	63.4	7.09	6.44	92.8	9.06	1.59	68.1	63.2	14.8	2.26	3.32	42.8	1.98	1.54	0.46	0.27	0.7	0.97	0.64	2.1	59.7	5.33	2.71	0.29	3.55	22.8	3.96	18.3	2.15	0.9	11.3	4.4	6.59	1.28	78.1	39.9	6.55	3.99	27.6	99.7	36.1	100	99.9	0.18	0.15	0.11	99.7	0.86	0.026
BPaL_M4	48.3	6.68	6.1	93.3	13.1	1.49	53.7	37.5	2.15	0.53	2.86	32	5.97	7.98	1.08	0.53	6.3	1.79	1.31	3.22	31.9	3.1	9.18	0.58	9.41	37.2	4.03	32.5	3.84	2.44	19.7	4.33	15.1	3.16	66.6	13.4	2.8	5.03	45.4	99.9	51.2	100	99.9	0.41	0.37	0.3	99.5	0.52	0.26
BPaS_M1	60.3	8.08	7.42	91.9	15.9	1.6	69.5	63.6	11.4	1.91	3.35	46.9	2.8	1.1	0.32	0.17	0.53	1.61	1.1	3.96	57	4.6	3.59	0.31	5.03	20.2	6.36	13.2	1.6	0.86	14.2	6.97	6.69	1.96	74.2	36.5	6.21	3.99	27.4	99.8	39.5	100	99.9	0.18	0.17	0.12	99.7	0.52	0.033
BPaS_M2	70.6	6	5.19	93.9	19	2.28	65.4	58.4	9.37	3.04	5.49	40.5	2.3	2.45	0.67	0.55	1.05	1.81	1.11	4.71	52.1	7.47	3.55	0.48	5.01	25.7	10.5	14	3.1	1.06	20.3	11	8.26	1.15	69.4	30.2	8.69	6.67	23.9	99.8	29.1	100	99.7	0.06	0.047	0.026	99.8	1.4	0.021
BPaS_M3	75.2	5.67	5.05	94.3	9.61	0.85	80.5	77.1	14.9	2.1	2.85	57.3	1.13	1	0.25	0.15	0.54	1	0.71	3.48	70.3	4.51	3.82	0.24	2.88	12.6	4.19	7.86	1.36	0.56	9.69	4.45	4.79	1.13	82.1	46	5.5	2.94	27.6	99.8	24.6	100	99.8	0.18	0.14	0.12	99.7	1.53	0.00536
[truncated: 5 more columns]
