# Supplementary material for: A modified BPaL regimen for tuberculosis treatment replaces linezolid with inhaled spectinamides
Source: eLife. 2024 Oct 8;13:RP96190. doi: 10.7554/eLife.96190 (PMC11460978; doi:10.7554/eLife.96190)
Supplement: Figure 6—source data 1. [file elife-96190-fig6-data1.xlsx]

## Sheet: Sheet1
	UnRx		BPaL			BPaS
	ms1	ms2	ms1	ms2	ms3	ms1	ms2	ms3
Ly6G+	94.17	67.24	9.62	21.97	37.47	30.97	3.99	1.63
F4/80+	4.29	23.7	20.02	22.39	15.96	25.28	45.01	36.1
CD4+	0.77	4.12	24.02	26.68	7.07	20.75	20.81	24.79
CD8+	0.19	0.57	0.96	1.44	3.05	1.13	2.75	1.58
Foxp3+	0.25	2	16.35	15.88	25.86	9.19	8.19	22.51
B220+	0.34	2.36	29.04	11.66	10.6	12.66	19.25	13.39
